# Supplementary material for: Safety of a topical insect repellent (picaridin) during community mass use for malaria control in rural Cambodia
Source: PubMed Central journal article supplement (PMC5365103; doi:10.1371/journal.pone.0172566), 2017-03-24
Supplement: pone.0172566.s001.pdf [file pone.0172566.s001.pdf]

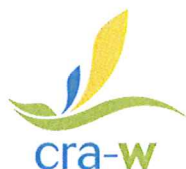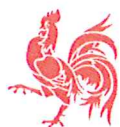

Wallonie

Plant Protection Products and Biocides  
Physico-chemistry and Residues Unit (U10)

Carson Building  
Rue du Bordia, 11  
B - 5030 GEMBLOUX - Belgium  
Phone : +32 (0) 81 62.52.62 - Fax : +32 (0) 81 62.52.72  
E-mail : pesticides@cra.wallonie.be

**Institute of Tropical Medicine Antwerp**  
Department of Biomedical Science  
Unit of Medical Entomology  
Nationalestraat 155  
B-2000 Antwerpen  
**BELGIUM**

To Prof. Marc Coosemans

## **CERTIFICATE OF ANALYSIS ITM / FO 23005 / Ch.5362 to 5365 / 2012 / A**

**Samples of : Repellent spray**

Declared active substance content : icaridin 20% w/w  
Manufacturer : SC Johnson  
Batch number : MANF 170212 20 – A1 106018

**Repellent spray**

Declared active substance content : icaridin 20% w/w  
Manufacturer : SC Johnson  
Batch number : MANF 160212 03 – A1 005913

**Repellent lotion**

Declared active substance content : icaridin 10% w/w  
Manufacturer : SC Johnson  
Batch number : MANF 220212 70 – C1 074256

**Repellent lotion**

Declared active substance content : icaridin 10% w/w  
Manufacturer : SC Johnson  
Batch number : MANF 210212 76 – C1 039490

**Supplier** : Institute of Tropical Medicine Antwerp.

**Arrived on** : July 30, 2012.

**Type of package** : plastic flask of 100 mL.

**Reference** : Request of July 27, 2012 from Prof. Marc Coosemans (Institute of Tropical Medicine Antwerp).

---

**RESULTS** :

**1. Icaridin content**

[CIPAC method 740/TC/(M)/3, CIPAC Handbook K, p.65, Gas Chromatography with Flame Ionization Detection (GC-FID)].

Dates of analysis : from November 21 until November 22, 2012.

**Repellent spray - Batch MANF 170212 20 – A1 106018**

WHO general specification limit : 20% w/w  $\pm$  6% [18.8 – 21.2 % w/w]

| Determination                                                                  | Icaridin content<br>(% w/w)        |
|--------------------------------------------------------------------------------|------------------------------------|
| 1                                                                              | 19.94                              |
| 2                                                                              | 20.02                              |
| 3                                                                              | 19.88                              |
| <b>Mean</b>                                                                    | <b>19.95</b>                       |
| Standard deviation                                                             | 0.07                               |
| Relative standard deviation (RSD) *                                            | 0.35 %                             |
| Confidence interval of the mean<br>(Student T-test with a probability of 95 %) | <b>19.95 <math>\pm</math> 0.17</b> |

\* RSD < RSD Horwitz x 0.67 (1.71 %).

**Repellent spray - Batch MANF 160212 03 – A1 005913**

WHO general specification limit : 20% w/w  $\pm$  6% [18.8 – 21.2 % w/w]

| Determination                                                                  | Icaridin content<br>(% w/w)        |
|--------------------------------------------------------------------------------|------------------------------------|
| 1                                                                              | 19.95                              |
| 2                                                                              | 20.19                              |
| 3                                                                              | 19.67                              |
| <b>Mean</b>                                                                    | <b>19.94</b>                       |
| Standard deviation                                                             | 0.26                               |
| Relative standard deviation (RSD) *                                            | 1.30 %                             |
| Confidence interval of the mean<br>(Student T-test with a probability of 95 %) | <b>19.94 <math>\pm</math> 0.65</b> |

\* RSD < RSD Horwitz x 0.67 (1.71 %).

**Repellent lotion - Batch MANF 220212 70 – C1 074256**WHO general specification limit : 10% w/w  $\pm$  10% [9.0 – 10.0 % w/w]

| Determination                                                                  | Icaridin content<br>(% w/w)       |
|--------------------------------------------------------------------------------|-----------------------------------|
| 1                                                                              | 9.08                              |
| 2                                                                              | 9.20                              |
| 3                                                                              | 9.07                              |
| <b>Mean</b>                                                                    | <b>9.12</b>                       |
| Standard deviation                                                             | 0.07                              |
| Relative standard deviation (RSD) *                                            | 0.77 %                            |
| Confidence interval of the mean<br>(Student T-test with a probability of 95 %) | <b>9.12 <math>\pm</math> 0.17</b> |

\* RSD &lt; RSD Horwitz x 0.67 (1.92 %).

**Repellent lotion - Batch MANF 210212 76 – C1 039490**WHO general specification limit : 10% w/w  $\pm$  10% [9.0 – 10.0 % w/w]

| Determination                                                                  | Icaridin content<br>(% w/w)       |
|--------------------------------------------------------------------------------|-----------------------------------|
| 1                                                                              | 9.75                              |
| 2                                                                              | 9.77                              |
| 3                                                                              | 9.78                              |
| <b>Mean</b>                                                                    | <b>9.77</b>                       |
| Standard deviation                                                             | 0.02                              |
| Relative standard deviation (RSD) *                                            | 0.20 %                            |
| Confidence interval of the mean<br>(Student T-test with a probability of 95 %) | <b>9.77 <math>\pm</math> 0.05</b> |

\* RSD &lt; RSD Horwitz x 0.67 (1.90 %).

## 2. Impurity sec-butyl chlorformate content

[Method developed by the test facility and based on CIPAC method 740/TC/(M)/3, CIPAC Handbook K, p.65, and Gas Chromatography with Mass Spectrometry Detection (GC-MS)].

Dates of analysis : from November 21 until December 01, 2012.

### Repellent spray - Batch MANF 170212 20 – A1 106018

| Determination                                                                  | sec-butyl chlorformate content |                              |
|--------------------------------------------------------------------------------|--------------------------------|------------------------------|
|                                                                                | g/kg                           | g/kg of the icaridin content |
| 1                                                                              | ND                             | ND                           |
| 2                                                                              | ND                             | ND                           |
| 3                                                                              | ND                             | ND                           |
| <b>Mean</b>                                                                    | <b>ND</b>                      | <b>ND</b>                    |
| Standard deviation                                                             | -                              | -                            |
| Relative standard deviation (RSD)                                              | -                              | -                            |
| Confidence interval of the mean<br>(Student T-test with a probability of 95 %) | -                              | -                            |

ND = not detected (limit of quantification = 0.005 g/kg or 0.025 g/kg of the icaridin content).

### Repellent spray - Batch MANF 160212 03 – A1 005913

| Determination                                                                  | sec-butyl chlorformate content |                              |
|--------------------------------------------------------------------------------|--------------------------------|------------------------------|
|                                                                                | g/kg                           | g/kg of the icaridin content |
| 1                                                                              | ND                             | ND                           |
| 2                                                                              | ND                             | ND                           |
| 3                                                                              | ND                             | ND                           |
| <b>Mean</b>                                                                    | <b>ND</b>                      | <b>ND</b>                    |
| Standard deviation                                                             | -                              | -                            |
| Relative standard deviation (RSD)                                              | -                              | -                            |
| Confidence interval of the mean<br>(Student T-test with a probability of 95 %) | -                              | -                            |

ND = not detected (limit of quantification = 0.005 g/kg or 0.025 g/kg of the icaridin content).

Repellent lotion - Batch MANF 220212 70 – C1 074256

| Determination                                                                  | sec-butyl chlorformate content |                                 |
|--------------------------------------------------------------------------------|--------------------------------|---------------------------------|
|                                                                                | g/kg                           | g/kg of the icaridin content ** |
| 1                                                                              | 0.008                          | 0.084                           |
| 2                                                                              | 0.008                          | 0.086                           |
| 3                                                                              | 0.008                          | 0.087                           |
| <b>Mean</b>                                                                    | <b>0.008</b>                   | <b>0.086</b>                    |
| Standard deviation                                                             | 0.000                          | 0.002                           |
| Relative standard deviation (RSD) *                                            | 0.00 %                         | 1.78 %                          |
| Confidence interval of the mean<br>(Student T-test with a probability of 95 %) | <b>0.008 ± 0.000</b>           | <b>0.086 ± 0.001</b>            |

\* RSD < RSD Horwitz x 0.67 (5.54 %).

\*\* Using the result obtained for icaridin content.

Repellent lotion - Batch MANF 210212 76 – C1 039490

| Determination                                                                  | sec-butyl chlorformate content |                                 |
|--------------------------------------------------------------------------------|--------------------------------|---------------------------------|
|                                                                                | g/kg                           | g/kg of the icaridin content ** |
| 1                                                                              | 0.007                          | 0.070                           |
| 2                                                                              | 0.007                          | 0.072                           |
| 3                                                                              | 0.007                          | 0.073                           |
| <b>Mean</b>                                                                    | <b>0.007</b>                   | <b>0.072</b>                    |
| Standard deviation                                                             | 0.000                          | 0.002                           |
| Relative standard deviation (RSD) *                                            | 0.00 %                         | 2.13 %                          |
| Confidence interval of the mean<br>(Student T-test with a probability of 95 %) | <b>0.007 ± 0.000</b>           | <b>0.072 ± 0.004</b>            |

\* RSD < RSD Horwitz x 0.67 (5.66 %).

\*\* Using the result obtained for icaridin content.

### 3. Impurity sec-butyl carbonic anhydride content

[Method developed by the test facility and based on CIPAC method 740/TC/(M)/3, CIPAC Handbook K, p.65, and Gas Chromatography with Mass Spectrometry Detection (GC-MS)].

Dates of analysis : from November 21 until December 01, 2012.

#### Repellent spray - Batch MANF 170212 20 – A1 106018

| Determination                                                                  | sec-butyl carbonic anhydride content |                                 |
|--------------------------------------------------------------------------------|--------------------------------------|---------------------------------|
|                                                                                | g/kg                                 | g/kg of the icaridin content ** |
| 1                                                                              | 0.180                                | 0.904                           |
| 2                                                                              | 0.182                                | 0.915                           |
| 3                                                                              | 0.187                                | 0.937                           |
| <b>Mean</b>                                                                    | <b>0.183</b>                         | <b>0.919</b>                    |
| Standard deviation                                                             | 0.004                                | 0.017                           |
| Relative standard deviation (RSD) *                                            | 1.97 %                               | 1.83 %                          |
| Confidence interval of the mean<br>(Student T-test with a probability of 95 %) | <b>0.183 ± 0.009</b>                 | <b>0.919 ± 0.042</b>            |

\* RSD < RSD Horwitz x 0.67 (3.46 %).

\*\* Using the result obtained for icaridin content.

#### Repellent spray - Batch MANF 160212 03 – A1 005913

| Determination                                                                  | sec-butyl carbonic anhydride content |                                 |
|--------------------------------------------------------------------------------|--------------------------------------|---------------------------------|
|                                                                                | g/kg                                 | g/kg of the icaridin content ** |
| 1                                                                              | 0.184                                | 0.921                           |
| 2                                                                              | 0.182                                | 0.912                           |
| 3                                                                              | 0.177                                | 0.890                           |
| <b>Mean</b>                                                                    | <b>0.181</b>                         | <b>0.908</b>                    |
| Standard deviation                                                             | 0.004                                | 0.016                           |
| Relative standard deviation (RSD) *                                            | 1.99 %                               | 1.76 %                          |
| Confidence interval of the mean<br>(Student T-test with a probability of 95 %) | <b>0.181 ± 0.009</b>                 | <b>0.908 ± 0.040</b>            |

\* RSD < RSD Horwitz x 0.67 (3.47 %).

\*\* Using the result obtained for icaridin content.

Repellent lotion - Batch MANF 220212 70 – C1 074256

| Determination                                                                  | sec-butyl carbonic anhydride content |                                 |
|--------------------------------------------------------------------------------|--------------------------------------|---------------------------------|
|                                                                                | g/kg                                 | g/kg of the icaridin content ** |
| 1                                                                              | 0.092                                | 1.008                           |
| 2                                                                              | 0.096                                | 1.055                           |
| 3                                                                              | 0.092                                | 1.005                           |
| <b>Mean</b>                                                                    | <b>0.093</b>                         | <b>1.023</b>                    |
| Standard deviation                                                             | 0.002                                | 0.028                           |
| Relative standard deviation (RSD) *                                            | 2.47 %                               | 2.74 %                          |
| Confidence interval of the mean<br>(Student T-test with a probability of 95 %) | <b>0.093 ± 0.006</b>                 | <b>1.023 ± 0.070</b>            |

\* RSD < RSD Horwitz x 0.67 (3.83 %).

\*\* Using the result obtained for icaridin content.

Repellent lotion - Batch MANF 210212 76 – C1 039490

| Determination                                                                  | sec-butyl carbonic anhydride content |                                 |
|--------------------------------------------------------------------------------|--------------------------------------|---------------------------------|
|                                                                                | g/kg                                 | g/kg of the icaridin content ** |
| 1                                                                              | 0.099                                | 1.016                           |
| 2                                                                              | 0.103                                | 1.058                           |
| 3                                                                              | 0.099                                | 1.009                           |
| <b>Mean</b>                                                                    | <b>0.100</b>                         | <b>1.028</b>                    |
| Standard deviation                                                             | 0.002                                | 0.027                           |
| Relative standard deviation (RSD) *                                            | 2.30 %                               | 2.58 %                          |
| Confidence interval of the mean<br>(Student T-test with a probability of 95 %) | <b>0.100 ± 0.006</b>                 | <b>1.028 ± 0.066</b>            |

\* RSD < RSD Horwitz x 0.67 (3.79 %).

\*\* Using the result obtained for icaridin content.



Dr. ir. Olivier PIGEON  
Scientific Unit Coordinator
