# Supplementary material for: Safety of a topical insect repellent (picaridin) during community mass use for malaria control in rural Cambodia
Source: PubMed Central journal article supplement (PMC5365103; doi:10.1371/journal.pone.0172566), 2017-03-24
Supplement: pone.0172566.s002.pdf [file pone.0172566.s002.pdf]

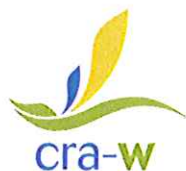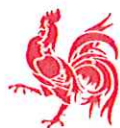

Wallonie

Plant Protection Products and Biocides  
Physico-chemistry and Residues Unit (U10)  
Carson Building  
Rue du Bordia, 11  
B - 5030 GEMBLOUX - Belgium  
Phone : +32 (0) 81 62.52.62 - Fax : +32 (0) 81 62.52.72  
E-mail : pesticides@cra.wallonie.be

Institute of Tropical Medicine Antwerp  
Department of Biomedical Science  
Unit of Medical Entomology  
Nationalestraat 155  
B-2000 Antwerpen  
BELGIUM

To Prof. Marc Coosemans

## CERTIFICATE OF ANALYSIS ITM / FO 23458 / Ch.5774 / 2013 / A

**Samples of :** Repellent spray

Declared active substance content : icaridin 20% w/w  
Manufacturer : SC Johnson  
Batch number : MANF 250113 65 - A2 094478

**Supplier :** Institute of Tropical Medicine Antwerp.

**Arrived on :** October 14, 2013.

**Type of package :** plastic flask of 100 mL.

**Reference :** Request of October 01, 2013 from Prof. Marc Coosemans (Institute of Tropical Medicine Antwerp).

### **RESULTS :**

#### 1. **Icaridin content**

[CIPAC method 740/TC/(M)/3, CIPAC Handbook K, p. 65, Gas Chromatography with Flame Ionization Detection (GC-FID)].

**Dates of analysis :** November 20, 2013.

**Repellent spray - Batch MANF 250113 65 - A2 094478**

WHO general specification limit : 20% w/w  $\pm$  6% [18.8 – 21.2 % w/w]

| Determination                                                                  | Icaridin content<br>(% w/w)        |
|--------------------------------------------------------------------------------|------------------------------------|
| 1                                                                              | 20.02                              |
| 2                                                                              | 20.02                              |
| 3                                                                              | 19.98                              |
| <b>Mean</b>                                                                    | <b>20.01</b>                       |
| Standard deviation                                                             | 0.02                               |
| Relative standard deviation (RSD) *                                            | 0.10 %                             |
| Confidence interval of the mean<br>(Student T-test with a probability of 95 %) | <b>20.01 <math>\pm</math> 0.05</b> |

\* RSD < RSD Horwitz x 0.67 (1.71 %).

## 2. Impurity sec-butyl chlorformate content

[Method developed by the test facility and based on CIPAC method 740/TC/(M)/3, CIPAC Handbook K, p. 65, and Gas Chromatography with Mass Spectrometry Detection (GC-MS)].

Dates of analysis : from December 02 until December 03, 2013.

Repellent spray - Batch MANF 250113 65 - A2 094478

| Determination                                                                  | sec-butyl chlorformate content |                              |
|--------------------------------------------------------------------------------|--------------------------------|------------------------------|
|                                                                                | g/kg                           | g/kg of the icaridin content |
| 1                                                                              | ND                             | ND                           |
| 2                                                                              | ND                             | ND                           |
| 3                                                                              | ND                             | ND                           |
| <b>Mean</b>                                                                    | <b>ND</b>                      | <b>ND</b>                    |
| Standard deviation                                                             | -                              | -                            |
| Relative standard deviation (RSD)                                              | -                              | -                            |
| Confidence interval of the mean<br>(Student T-test with a probability of 95 %) | -                              | -                            |

ND = not detected (limit of quantification = 0.005 g/kg or 0.025 g/kg of the icaridin content).

## 3. Impurity sec-butyl carbonic anhydride content

[Method developed by the test facility and based on CIPAC method 740/TC/(M)/3, CIPAC Handbook K, p. 65, and Gas Chromatography with Mass Spectrometry Detection (GC-MS)].

Dates of analysis : from December 02 until December 03, 2013.

Repellent spray - Batch MANF 250113 65 - A2 094478

| Determination                                                                  | sec-butyl carbonic anhydride content |                                 |
|--------------------------------------------------------------------------------|--------------------------------------|---------------------------------|
|                                                                                | g/kg                                 | g/kg of the icaridin content ** |
| 1                                                                              | 0.173                                | 0.864                           |
| 2                                                                              | 0.175                                | 0.873                           |
| 3                                                                              | 0.179                                | 0.894                           |
| <b>Mean</b>                                                                    | <b>0.176</b>                         | <b>0.877</b>                    |
| Standard deviation                                                             | 0.003                                | 0.015                           |
| Relative standard deviation (RSD) *                                            | 1.74 %                               | 1.76 %                          |
| Confidence interval of the mean<br>(Student T-test with a probability of 95 %) | <b>0.176 ± 0.008</b>                 | <b>0.877 ± 0.038</b>            |

\* RSD < RSD Horwitz x 0.67 (3.48 %).

\*\* Using the result obtained for icaridin content.

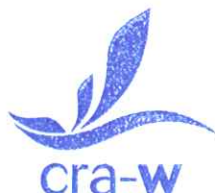

December 10, 2013

Dr ir Olivier PIGEON  
Scientific Unit Coordinator
